# Supplementary material for: Membrane and synaptic defects leading to neurodegeneration in Adar mutant Drosophila are rescued by increased autophagy
Source: PubMed Central journal article supplement (PMC7020516; doi:10.1186/s12915-020-0747-0), 2020-02-14
Supplement: 12915_2020_747_MOESM1_ESM.pdf [file 12915_2020_747_MOESM1_ESM.pdf]

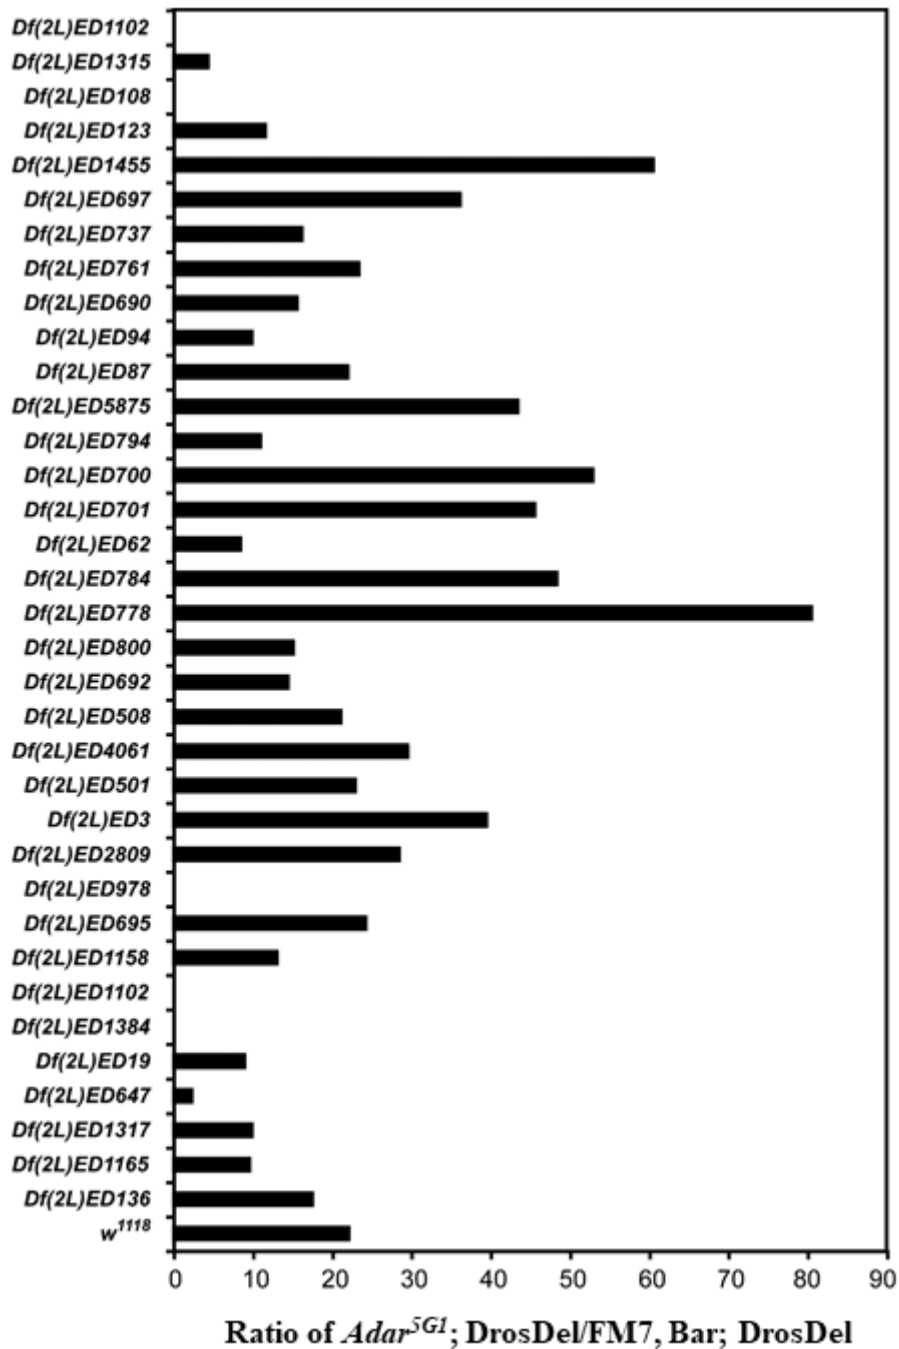

**Supplementary Figure S1. Screen of *DrosDel* deletions on Chromosome 2L for rescue of *Adar*<sup>5G1</sup> viability.** Ratio of *Adar*<sup>5G1</sup> to *FM7 Bar* genotypes among male progeny in the presence of *DrosDel* deficiencies, or in their absence (*w*<sup>1118</sup> cross at the bottom) (expressed as a percentage). Progeny are obtained by crossing *Adar*<sup>5G1</sup> / *FM7, Bar* virgin females to males to *w*<sup>1118</sup> males or males of *DrosDel*/*SM5, Cy* deficiency stocks.
