# Supplementary material for: Membrane and synaptic defects leading to neurodegeneration in Adar mutant Drosophila are rescued by increased autophagy
Source: PubMed Central journal article supplement (PMC7020516; doi:10.1186/s12915-020-0747-0), 2020-02-14
Supplement: 12915_2020_747_MOESM2_ESM.pdf [file 12915_2020_747_MOESM2_ESM.pdf]

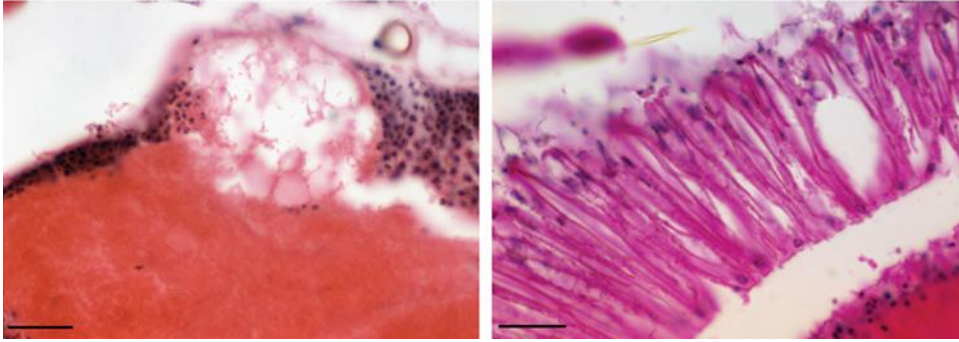

**Supplementary Figure S2. *Adar*<sup>5GI</sup> neurodegeneration at 30 days.**

Images of 6 micron thick haematoxylin and eosin stained sections through mushroom body calyces (left panels, (63X)) and retinas (right panels, 40X) of 30-day *Adar*<sup>5GI</sup>.
