# Supplementary material for: Membrane and synaptic defects leading to neurodegeneration in Adar mutant Drosophila are rescued by increased autophagy
Source: PubMed Central journal article supplement (PMC7020516; doi:10.1186/s12915-020-0747-0), 2020-02-14
Supplement: 12915_2020_747_MOESM4_ESM.pdf [file 12915_2020_747_MOESM4_ESM.pdf]

|    | <b>NAME</b>                                            | <b>SYMBOL</b>           | <b>GO BIOLOGICAL PROCESS<br/>(Flybase)</b>                                             |
|----|--------------------------------------------------------|-------------------------|----------------------------------------------------------------------------------------|
| 1  | <i>SNF4/AMP-activated protein kinase gamma subunit</i> | <i>SNF4Agamma<br/>a</i> | autophagy   inferred from mutant phenotype                                             |
| 2  | <i>Gigyf</i>                                           | <i>Gyf</i>              | regulation of autophagy   inferred from genetic interaction with Atg1, Atg13           |
| 3  | <i>Nitrogen permease regulator-like 3</i>              | <i>Nprl3</i>            | negative regulation of TOR signaling   inferred from mutant phenotype                  |
| 4  | <i>multiple ankyrin repeats single KH domain</i>       | <i>mask</i>             | inferred from mutant phenotype inferred from genetic interaction with Atg18a           |
| 5  | <i>AMP-activated protein kinase alpha subunit</i>      | <i>AMPKalpha</i>        | negative regulation of TOR signaling                                                   |
| 6  | <i>Protein modification; protein ubiquitination</i>    | <i>hiw</i>              | autophagy   inferred from direct assay                                                 |
| 7  | <i>Acinus</i>                                          | <i>Acn</i>              | regulation of autophagy   inferred from mutant phenotype                               |
| 8  | <i>Autophagy-related 17</i>                            | <i>Atg17</i>            | autophagy   inferred from mutant phenotype inferred from genetic interaction with Atg1 |
| 9  | <i>Autophagy-related 14</i>                            | <i>Atg14</i>            | regulation of autophagy   inferred from mutant phenotype                               |
| 10 | <i>forkhead box, sub-group O</i>                       | <i>foxo</i>             | regulation of autophagy   inferred from mutant phenotype                               |
| 11 | <i>straightjacket</i>                                  | <i>stj</i>              | autophagosome maturation   inferred from mutant phenotype                              |
| 12 | <i>mauve</i>                                           | <i>mv</i>               | negative regulation of autophagosome size   inferred from mutant phenotype             |
| 13 | <i>Darkener of apricot</i>                             | <i>Doa</i>              | positive regulation of autophagy  inferred from mutant phenotype                       |
| 14 | <i>similar</i>                                         | <i>sima</i>             | positive regulation of autophagy  inferred from mutant phenotype                       |
| 15 | <i>Ecdysone receptor</i>                               | <i>EcR</i>              | regulation of autophagy   inferred from mutant phenotype                               |
| 16 | <i>Protein phosphatase 2A at 29B</i>                   | <i>Pp2A-29B</i>         | autophagy   inferred from mutant phenotype                                             |
| 17 | <i>Adaptor Protein complex 2, alpha subunit</i>        | <i>AP-2alpha</i>        | positive regulation of autophagy  inferred from mutant phenotype                       |
| 18 | <i>cacophony</i>                                       | <i>cac</i>              | autophagosome maturation   inferred from mutant phenotype                              |

|    |                                   |                 |                                                 |
|----|-----------------------------------|-----------------|-------------------------------------------------|
| 19 | <i>rolled</i>                     | <i>rl</i>       | macroautophagy   inferred from mutant phenotype |
| 20 | <i>spaghetti-squash activator</i> | <i>sqa</i>      | autophagy   inferred from mutant phenotype      |
| 21 | <i>Ubiquitin-63E</i>              | <i>Ubi-p63E</i> | autophagy   inferred from mutant phenotype      |
| 22 | <i>widerborst</i>                 | <i>wdb</i>      | autophagy   inferred from mutant phenotype      |

**Supplementary Table 1: List of Adar edited transcripts encoding proteins required for autophagy.** Source: FlyBase.
