# Supplementary material for: Membrane and synaptic defects leading to neurodegeneration in Adar mutant Drosophila are rescued by increased autophagy
Source: PubMed Central journal article supplement (PMC7020516; doi:10.1186/s12915-020-0747-0), 2020-02-14
Supplement: 12915_2020_747_MOESM5_ESM.pdf [file 12915_2020_747_MOESM5_ESM.pdf]

|                        |                       |
|------------------------|-----------------------|
| Hsc70-4 forward Primer | CCAGGGTAATCGTACCACTCC |
| Hsc70-4 Reverse Primer | GCGTCGAAGATCGTCTGGG   |

**Supplementary Table 2:** Primers used for qPCR
